# Supplementary material for: Visual short-term memory in action and non-action video game players: A focus on short and long delay intervals
Source: Springer Nature journal article supplement (doi:10.3758/s13414-025-03118-2), 2025-06-23
Supplement: MOESM1 [file 13414_2025_3118_MOESM1_ESM.docx]

**Visual short-term memory in action and non-action video game players: A focus on short and long delay intervals**

**SUPPLEMENTARY MATERIAL**

*Questionnaire-1*

**Video Game Playing Questionnaire – *DURING* THE PAST YEAR**

Name: _______________________________

Gender: ______________________________

Date: ________________________________

| **THIS QUESTION IS ABOUT YOUR GAMING ACTIVITIES DURING THE PAST 12 MONTHS**  For each type of game, specify the number of hours played per week **when you played the most**.  You will be given the choice between 6 different answers; Please choose one and only one: **never ; less than 1 hour ; between 1 and 3 hours ; between 3 and 5 hours ; between 5 and 10 hours ; more than 10 hours**  *If your answer is at the cut-off, please select the lower option (e.g. if 3 hours per week, select 1 to 3)*  *If you are playing Fortnite and/or Minecraft, please classify as shown:*  Fortnite: Save the World or Battle Royale = First/Third Person Shooters  Fortnite Creative = Puzzle  Minecraft = Puzzle | Hours/week | | | | | |
| --- | --- | --- | --- | --- | --- | --- |
| never | less than 1 hour | between 1 and 3 hours | between 3 and 5 hours | between 5 and 10 hours | more than 10 hours |
| **FIRST/THIRD PERSON SHOOTERS**  *(Call Of Duty, Halo, Battlefield, Half-Life, Overwatch, Counterstrike …)* |  |  |  |  |  |  |
| **ACTION-RPG/ADVENTURE**  *(The Witcher, Mass Effect, Fallout 4, Skyrim, GTA, Assassin’s Creed, Tomb Raider, The Last of Us, ...)* |  |  |  |  |  |  |
| **SPORTS/DRIVING**  *(Fifa, NHL, Mario Kart, Need for Speed, Forza, …)* |  |  |  |  |  |  |
| **REAL-TIME STRATEGY/MOBA**  *(Starcraft, Warcraft I, II & III, DotA, Command & Conquer, League of Legends, Age of Empires, …)* |  |  |  |  |  |  |
| **TURN-BASED/NON-ACTION ROLE-PLAYING/FANTASY**  *(World of Warcraft, Final Fantasy, Fable, Pokemon, Dragon Age, …)* |  |  |  |  |  |  |
| **TURN-BASED STRATEGY/LIFE SIMULATION/PUZZLE**  *(Civilization, Hearthstone, The Sims, Restaurant Empire, Puzzle Quest, Bejeweled, Solitaire, Candy Crush, …)* |  |  |  |  |  |  |
| **MUSIC GAMES**  *(Guitar Hero, DDR, Rock Band, …)* |  |  |  |  |  |  |
| **OTHER: games that don’t fit into any of the categories**  *(Phone games, Browser games, Fighting games, etc.)* |  |  |  |  |  |  |

**Video Game Playing Questionnaire – *BEFORE* THE PAST YEAR**

| **THIS QUESTION IS ABOUT YOUR GAMING ACTIVITIES ANYTIME BEFORE THE PAST 12 MONTHS**  For each type of game, specify the number of hours played per week **when you played the most**.  You will be given the choice between 6 different answers; Please choose one and only one: **never ; less than 1 hour ; between 1 and 3 hours ; between 3 and 5 hours ; between 5 and 10 hours ; more than 10 hours**  *If your answer is at the cut-off, please select the lower option (e.g. if 3 hours per week, select 1 to 3)*  *If you are playing Fortnite and/or Minecraft, please classify as shown:*  Fortnite: Save the World or Battle Royale = First/Third Person Shooters  Fortnite Creative = Puzzle  Minecraft = Puzzle | Hours/week | | | | | |
| --- | --- | --- | --- | --- | --- | --- |
| never | less than 1 hour | between 1 and 3 hours | between 3 and 5 hours | between 5 and 10 hours | more than 10 hours |
| **FIRST/THIRD PERSON SHOOTERS**  *(Call Of Duty, Halo, Battlefield, Half-Life, Overwatch, Counterstrike …)* |  |  |  |  |  |  |
| **ACTION-RPG/ADVENTURE**  *(The Witcher, Mass Effect, Fallout 4, Skyrim, GTA, Assassin’s Creed, Tomb Raider, The Last of Us, ...)* |  |  |  |  |  |  |
| **SPORTS/DRIVING**  *(Fifa, NHL, Mario Kart, Need for Speed, Forza, …)* |  |  |  |  |  |  |
| **REAL-TIME STRATEGY/MOBA**  *(Starcraft, Warcraft I, II & III, DotA, Command & Conquer, League of Legends, Age of Empires, …)* |  |  |  |  |  |  |
| **TURN-BASED/NON-ACTION ROLE-PLAYING/FANTASY**  *(World of Warcraft, Final Fantasy, Fable, Pokemon, Dragon Age, …)* |  |  |  |  |  |  |
| **TURN-BASED STRATEGY/LIFE SIMULATION/PUZZLE**  *(Civilization, Hearthstone, The Sims, Restaurant Empire, Puzzle Quest, Bejeweled, Solitaire, Candy Crush, …)* |  |  |  |  |  |  |
| **MUSIC GAMES**  *(Guitar Hero, DDR, Rock Band, …)* |  |  |  |  |  |  |
| **OTHER: games that don’t fit into any of the categories**  *(Phone games, Browser games, Fighting games, etc.)* |  |  |  |  |  |  |

**Table S1.** Self-reported video game playing habits for each participant during the past year in response to Questionnaire-1. FPS: First/Third Person Shooter Games, APRG/ADV: Action Role-Playing/ Adventure Games, SPT/DRV: Sports/Driving Games, RTS/MOBA: Real-Time Strategy/Multiplayer Online Battle Arena Games, TB/NA RPG: Turn-Based/Non-Action Role-Playing/Fantasy Games, TBS: Turn-Based Strategy/Life Simulation/Puzzle Games, MUS: Music Games, OTH: Other games that do not fit into any of these categories.

|  |  | Duration of Video Game Playing (hours/week) by Genre | | | | | | | |
| --- | --- | --- | --- | --- | --- | --- | --- | --- | --- |
| ID | **Group** | **FPS** | **APRG/**  **ADV** | **SPT/**  **DRV** | **RTS/**  **MOBA** | **TB/NA RPG** | **TBS** | **MUS** | **OTH** |
| PA01 | AVGPs | 0 | 5-10 | 0 | 0-1 | 0 | 1-3 | 0 | 0 |
| PA02 | AVGPs | > 10 | > 10 | 0 | > 10 | 0 | > 10 | 1-3 | > 10 |
| PA03 | AVGPs | > 10 | 1-3 | 1-3 | > 10 | > 10 | 0-1 | NA | 0-1 |
| PA04 | AVGPs | > 10 | > 10 | > 10 | 1-3 | 0 | 0-1 | 0 | 0 |
| PA05 | AVGPs | 5-10 | 0 | 0 | 0 | 0 | > 10 | 0 | 0 |
| PA06 | AVGPs | 5-10 | 5-10 | > 10 | 0-1 | 1-3 | 0-1 | 0 | 0-1 |
| PA07 | AVGPs | 3-5 | 5-10 | > 10 | 0-1 | NA | NA | 0 | 0-1 |
| PA08 | AVGPs | > 10 | 5-10 | 0-1 | 3-5 | 0 | 3-5 | 0 | 1-3 |
| PA09 | AVGPs | 5-10 | 3-5 | 5-10 | 0 | 1-3 | 0 | 1-3 | 1-3 |
| PA10 | AVGPs | > 10 | 3-5 | 3-5 | 0-1 | 0-1 | 0-1 | 0 | > 10 |
| PA11 | AVGPs | 0-1 | > 10 | 0 | 0-1 | > 10 | 0 | 1-3 | 0-1 |
| PA12 | AVGPs | 3-5 | > 10 | 0-1 | > 10 | > 10 | > 10 | 0 | 1-3 |
| PA13 | AVGPs | > 10 | > 10 | 3-5 | 5-10 | 1-3 | 1-3 | 0 | > 10 |
| PA14 | AVGPs | > 10 | > 10 | > 10 | > 10 | > 10 | > 10 | 0 | > 10 |
| PA15 | AVGPs | 1-3 | > 10 | 0 | 0 | 0 | > 10 | 0 | 0 |
| PA16 | AVGPs | 5-10 | 3-5 | 1-3 | 0 | 0 | 0 | 0 | 0 |
| PA17 | AVGPs | 0-1 | > 10 | 0-1 | 1-3 | 1-3 | 0-1 | 0 | 0 |
| PA18 | AVGPs | 5-10 | 3-5 | 0-1 | 0 | 0-1 | 5-10 | 0-1 | > 10 |
| PA19 | AVGPs | > 10 | > 10 | 0 | > 10 | 0 | > 10 | 0 | 3-5 |
| PA20 | AVGPs | > 10 | > 10 | 0-1 | 3-5 | 0-1 | > 10 | 0 | 5-10 |
| PA21 | AVGPs | > 10 | > 10 | > 10 | 0-1 | 3-5 | 5-10 | 5-10 | > 10 |
| PA22 | AVGPs | > 10 | 1-3 | 0 | 5-10 | 0 | 5-10 | 0 | 0 |
| PA23 | AVGPs | > 10 | > 10 | 0-1 | 3-5 | 0 | > 10 | 0 | 10-5 |
| PA24 | AVGPs | > 10 | 5-10 | 1-3 | > 10 | 1-3 | 5-10 | 0 | 0-1 |
| PN01 | NAVGPs | 0-1 | 0-1 | 1-3 | 0 | 0 | 0 | 0-1 | 0-1 |
| PN02 | NAVGPs | 0 | 0 | 0 | 0 | 0 | 0 | 0 | 0 |
| PN03 | NAVGPs | 0 | 0 | 0 | 0 | 0 | 0 | 0 | 0 |
| PN04 | NAVGPs | 0 | 0 | 0-1 | 0 | 0 | 0 | 0 | 0-1 |
| PN05 | NAVGPs | 0 | 0 | 0 | 0 | 0 | 0 | 0 | 0 |
| PN06 | NAVGPs | 0 | 0 | > 10 | 0 | 0 | 0 | 1-3 | 0-1 |
| PN07 | NAVGPs | 0-1 | 0 | 0-1 | 0 | 0 | 0-1 | 0 | 0 |
| PN08 | NAVGPs | 0-1 | 0 | 0 | 0-1 | 0 | 0 | 0 | 0 |
| PN09 | NAVGPs | 0 | 0 | 0 | 0 | 0 | 0-1 | 0 | 0 |
| PN10 | NAVGPs | 0 | 0 | 0 | 0 | 0 | 0 | 0 | 0 |
| PN11 | NAVGPs | 0 | 0 | 0 | 0 | 0 | 0 | 0 | 0 |
| PN12 | NAVGPs | 0 | 0 | 0-1 | 0 | 0 | 0 | 0 | 0 |
| PN13 | NAVGPs | 0 | 0 | 0 | 0 | 0 | 0 | 0 | 0 |
| PN14 | NAVGPs | 0-1 | 0 | 0 | 0 | 0 | 0 | 0 | 0 |
| PN15 | NAVGPs | 0 | 0 | 0 | 0-1 | 0 | 0-1 | 0 | 0-1 |
| PN16 | NAVGPs | 0 | 0-1 | 0 | 0-1 | 0 | 0-1 | 0 | 1-3 |
| PN17 | NAVGPs | 0 | 0 | 0 | 0 | 0 | 0 | 0 | 0 |
| PN18 | NAVGPs | 0 | 0 | 0-1 | 0 | 0 | 0-1 | 0 | 0 |
| PN19 | NAVGPs | 0 | 0 | 3-5 | 0 | 0 | 0-1 | 0 | 0-1 |
| PN20 | NAVGPs | 0 | 0 | 0 | 0 | 0 | 0-1 | 0 | 0-1 |
| PN21 | NAVGPs | 0 | 0 | 0 | 0 | 0 | 0 | 0 | 0-1 |
| PN22 | NAVGPs | 0 | 0 | 0 | 0 | 0 | 0 | 0 | 1-3 |
| PN23 | NAVGPs | 0 | 0-1 | 0 | 0 | 0 | 0 | 0 | 0 |
| PN24 | NAVGPs | 0-1 | 0 | 0 | 3-5 | 0 | 1-3 | 0 | 0 |

*Questionnaire-2 (questionnaire used for the pilot study)*

**This questionnaire is to assess your history with video games to determine within the study if you fall into the action video gamer, non-action video gamer, or non-video gamer categories. When considering your current experience with video games, please refer to the last 6 months of activity. Please answer as many questions as possible or make an estimation if you are unsure.**

Age:

Gender:

**1: How many hours a day do you play video games? Please circle.**

No time 1-2hrs 3-6hrs 7-10hrs 11-14hrs 15+hrs

**2: How many days a week do you play video games? Please circle.**

No days 1-2 days 3-4 days 5-6 days 7 days

**3: How many hours a week do you play video games? Please circle.**

No time 1-2hrs 3-6hrs 7-10hrs 11-14hrs 15+hrs

**4: How often do you play video games? Please circle.**

No days Every day Every other day Every 3-6 days Once a week

Once a fortnight More than once a month Less than once a month

**5: How many hours a day do you play First Person Shooters? (e.g., Call of Duty, Battlefield etc) Please circle.**

No time 1-2hrs 3-6hrs 7-10hrs 11-14hrs 15+hrs

**6: How many days a week do you play First Person Shooters? (e.g., Call of Duty, Battlefield etc) Please circle.**

No days 1-2 days 3-4 days 5-6 days 7 days

**7: How many hours a day do you play video game genres other than First Person Shooters? (e.g., Sports, Strategy, Simulation, Adventure, etc.) Please circle.**

No time 1-2hrs 3-6hrs 7-10hrs 11-14hrs 15+hrs

**8: How many days a week do you play video game genres other than First Person Shooters? (e.g., Sports, Strategy, Simulation, Adventure, etc.) Please circle.**

No days 1-2 days 3-4 days 5-6 days 7 days

**9: If longer than 6 months ago, when was the last time you played a video game? Please state.**

**………………………………………………………………………**

**10: Before the last 6 months, how often did you used to play video games? Please circle.**

No days Every day Every other day Every 3-6 days Once a week

Once a fortnight More than once a month Less than once a month

**Please, list below the video games you play most:**

*Assumption tests for the training*

In the training, the residuals of the number of blocks were not normally distributed (Shapiro-Wilk *W* = 0.60, *p* < 0.001), skewness was 2.04 (SE: 0.34), and the variances were not equal between the groups (*F*1,46 = 6.14, *p* = 0.02), thereby violating the assumptions for an independent samples t-test. Therefore, a non-parametric test, specifically the Mann-Whitney U test, was used for group comparisons. Regarding the precision scores during the training, the residuals were also not normally distributed (Shapiro-Wilk *W* = 0.90, *p* < 0.001), with a skewness of 1.19 (SE: 0.34), and equal variances between the groups (*F*1,46 = 2.69, *p* = 0.11), again a Mann-Whitney U test was used.

*Assumption tests for precision scores (sequence lengths)*

For the short retention interval, the residuals of the precision scores were not normally distributed (Shapiro-Wilk *W* = 0.94, *p* < 0.0001), skewness was 0.98 (SE: 0.18), and variances were not equal between the groups (*F*1,190 = 5.21, *p* = 0.024), for the long retention interval, the residuals of the precision scores were also not normally distributed (Shapiro-Wilk *W* = 0.93, *p* < 0.0001), with a skewness of 0.80 (SE: 0.25), but with equal variances between groups (*F*1,94 = 3.08, *p* = 0.08). Due to multiple violations of the assumptions of factorial ANOVA for both short and long retention intervals, an Aligned Rank Transform ANOVA was employed.

*Assumption tests for precision scores (target serial position)*

In the short retention interval blocks, for sequence length of 1, the residuals of the precision scores were not normally distributed (Shapiro-Wilk *W* = 0.94, *p* = 0.023), with a skewness of 0.83 (SE: 0.34). Using the boxplot method, three outliers were identified (outlier precision values: 11.36, 15.58, and 2.06) but were nevertheless included in the analysis. The assumption of equality of variances between the two groups was satisfied (*F*1,46 = 1.6, *p* = 0.21). Similarly, for the sequence length of 2, the residuals of the precision scores were not normally distributed (Shapiro-Wilk *W* = 0.97, *p* = 0.023), with a skewness of 0.32 (SE: 0.25), and no outliers were detected using the boxplot method. The assumption of equality of variances between the two groups was satisfied (*F*1,94 = 0.78, *p* = 0.78). For the sequence length of 3, the residuals of the precision scores were not normally distributed (Shapiro-Wilk *W* = 0.95, *p* < 0.0001), with a skewness of 0.34 (SE: 0.2), and no outliers were identified through the boxplot method. The assumption of equal variances between the two groups was upheld (*F*1,142 = 2.69, *p* = 0.1). For a sequence length of 4, the residuals of the precision scores were not normally distributed (Shapiro-Wilk *W* = 0.88, *p* < 0.0001), with a skewness of 1.11 (SE: 0.18). One outlier data point was detected but was nevertheless included in the analysis (outlier precision value: 10.72), while the assumption of equal variances between the two groups was satisfied (*F*1,190 = 0.89, *p* = 0.35).

In the long retention interval blocks, for a sequence length of 1, the residuals of the precision scores were normally distributed (Shapiro-Wilk *W* = 0.97, *p* = 0.39), with a skewness of 0.27 (SE: 0.34). Two outliers were identified using the boxplot method (outlier precision values: 14.76 and 0.99) and they were also included in the analysis. The assumption of equality of variances between the two groups was met (*F*1,46 = 0.3, *p* = 0.59). However, for a sequence length of 4, the residuals of the precision scores were not normally distributed (Shapiro-Wilk *W* = 0.87, *p* < 0.0001), with a skewness of 1.19 (SE: 0.18). Five outlier data points were detected and included in the analysis (outlier precision values > 7), while the assumption of equality of variances between the two groups was upheld (*F*1,190 = 2.97, *p* = 0.086).

Due to multiple violations of the assumptions for an independent samples t-test for both short and long retention intervals within sequence length 1, the Mann-Whitney U test was utilized for group comparisons. For sequence lengths 2, 3, and 4, an Aligned Rank Transform ANOVA was employed due to numerous violations of the assumptions of parametric factorial ANOVA.

*Assumption tests for model parameters*

For each parameter estimated individually within the Resource-Rational model, we tested the assumptions of a t-test. In short retention interval blocks, the residuals for the *β* parameter, representing behavioral cost based on error magnitude, deviated from normal distribution (Shapiro-Wilk *W* = 0.87, *p* < 0.001), exhibiting a skewness of 0.98 (SE: 0.34). However, the assumption of equality of variances between the groups was satisfied (*F*1,46 = 0.32, *p* = 0.58). By employing the boxplot method, we identified one outlier (outlier *β* value: 4.73), which was subsequently replaced through linear interpolation. Concerning the λ parameter, denoting the weight of the neural cost relative to the behavioral cost, the residuals also departed from normal distribution (Shapiro-Wilk *W* = 0.93, *p* = 0.009), with a skewness of 0.87 (SE: 0.34). Nevertheless, equality of variances between the groups was confirmed (*F*1,46 = 0.12, *p* = 0.74). Employing the boxplot method revealed eight outliers (outlier λ values: 0.030, 0.018, 0.015, 0.008, 0.005(x3), and 0.004), which were likewise linearly interpolated.  For the τ parameter, specifying variability in memory precision across items, the residuals exhibited non-normal distribution (Shapiro-Wilk *W* = 0.90, *p* < 0.001), accompanied by a skewness of 0.98 (SE: 0.34). However, the assumption of equal variances between the groups held (*F*1,46 = 0.03, *p* = 0.87). Utilizing the boxplot method, three outliers (outlier τ values: 168.02, 86.40, and 76.35) were identified and subsequently addressed through linear interpolation.

In the long retention interval blocks, the residuals for the *β* parameter exhibited non-normal distribution (Shapiro-Wilk *W* = 0.80, *p* < 0.001), with a skewness of 1.46 (SE: 0.34). However, the assumption of equality of variances between the groups was met (*F*1, 46 = 0.37, *p* = 0.55). Using the boxplot method, five outliers were identified (outlier *β* values: 5.06, 2.33, 1.89, 1.88(x2)), which were subsequently addressed through linear interpolation. Regarding *λ* estimates, the residuals deviated from normal distribution (Shapiro-Wilk *W* = 0.92, *p* < 0.01), with a skewness of 0.78 (SE: 0.34). Nevertheless, equal variances between the groups were confirmed (*F*1, 46 = 3.02, *p* = 0.09). The boxplot method revealed ten outliers (0.266, 0.052, 0.043, 0.036, 0.031, 0.024, 0.012, 0.009, 0.006(x2)), which were addressed through linear interpolation. For the *τ* parameter, the residuals were not normally distributed (Shapiro-Wilk *W* = 0.94, *p* = 0.01). Skewness was 0.11 (SE: 0.34), and homogeneity of variances was confirmed (*F*1, 46 = 0.23, *p* = 0.64). No outliers were identified using the boxplot method.

For both short and long retention interval, due to numerous violations of the assumptions of an independent samples t-test, we opted for a nonparametric test for group comparisons, specifically employing the Mann-Whitney *U* test.

For optimal resource allocation computed using the individual parameter estimates from the Resource-Rational model, assumptions for parametric factorial ANOVA were tested. In short retention interval blocks, the residuals of values exhibited non-normal distribution (Shapiro-Wilk *W* = 0.89, *p* < 0.001), with a skewness of 1.43 (SE: 0.18). Homogeneity of variances between the groups was confirmed (*F*1, 190 = 2.70, *p* = 0.10). The boxplot method identified five outliers (outlier values: 110.24, 110.09, 96.58, 85.93, and 76.33), which were included in the analysis. In long retention interval blocks, the residuals of values were not normally distributed (Shapiro-Wilk *W* = 0.79, *p* < 0.001), exhibiting a skewness of 2.10 (SE: 0.25). Homogeneity of variances between groups was marginally satisfied (*F*1, 94 = 3.59, *p* = 0.06). The boxplot method identified five outliers (outlier values: 199.97, 178.21, 159.95, 145.69, and 119.67), which were nevertheless included in the analysis. For both short and long retention intervals, due to numerous violations of the normality assumptions, homogeneity of variances, the presence of outliers, we employed an Aligned Rank Transform ANOVA.

*Comparison of performance between Bilkent and Lincoln sites*

The study included participants from two institutions: Bilkent University (n = 35; AVGPs = 13, NAVGPs = 22) and the University of Lincoln (n = 13; AVGPs = 11, NAVGPs = 2). Due to the notable disparity in the number of non-action video game players (NAVGPs) between the two setups, the gamer category was excluded as a factor in the subsequent analyses. Additionally, short and long delay conditions were always analyzed separately.

*Training*

During the training session, we evaluated potential performance differences between participants from two experimental sites, Bilkent University and the University of Lincoln. The comparison focused on the number of training blocks and precision scores.

For the number of training blocks, no significant difference was found between the two experiment sites (Mann-Whitney *U* = 178.5, *p* = 0.19, *Rank-Biserial Correlation* = -0.22, 95% CI [-0.53, 0.15]). Similarly, precision scores did not differ significantly between the sites (Mann-Whitney *U* = 284, *p* = 0.19, *Rank-Biserial Correlation* = 0.25, 95% CI [-0.12, 0.55]).

*Short Delay (experiment site and sequence length)*

The performance of the participants who were recruited at Bilkent University and at the University of Lincoln were also compared in a factorial model including sequence length as a within-subjects factor.

For precision (Figure S1A), an aligned rank transformed linear mixed model with experiment site (Bilkent vs. Lincoln) as a between-subjects factor, sequence length as a within-subjects factor and random intercept across participants, revealed a significant main effect of sequence length (*F*3,138 = 88.66, *p* < 0.0001). However, there was no main significant effect of experiment site (*F*1,46 = 0.23, *p* = 0.63) and no significant interaction between site and sequence length (*F*3,138 = 1.20, *p* = 0.31).

For response times (Figure S1B), an aligned rank transformed linear mixed model with experiment site as a between-subjects factor, sequence length as a within-subjects factor and random intercept across participants, showed a significant main effect of sequence length (*F*3,138 = 63.27, *p* < 0.0001). The main effect of site (*F*1,46 = 0.44, *p* = 0.51) and the interaction between site and sequence length (*F*3,138 = 1.59, *p* = 0.20) were not significant.


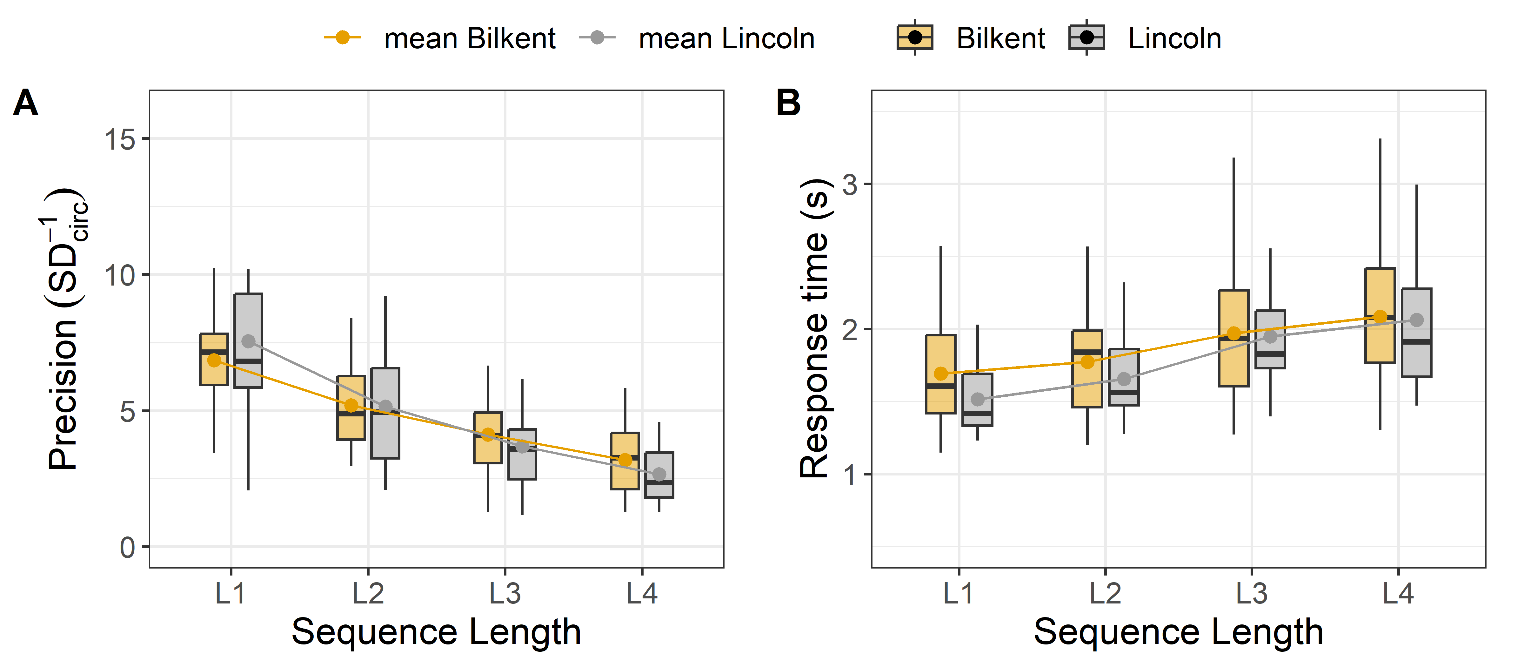


**Figure S1.** (**A**) Box plots of precision scores in the short delay condition for each sequence length in both experiment sites. (**B**) Box plots of response times in the short delay condition for each sequence length in both sites.

*Long Delay (experiment site and sequence length)*

For precision (Figure S2A), an aligned rank transformed linear mixed model including experiment site (Bilkent vs. Lincoln) as a between-subjects factor and sequence length as a within-subjects factor revealed a significant main effect of sequence length (*F*1,46 = 199.74, *p* < 0.0001) and a significant interaction between experiment site and sequence length (*F*1,46 = 5.55, *p* = 0.02) (see Table S2 for the pairwise comparisons). The main effect of experiment site was not significant (*F*1,46 = 0.02, *p* = 0.90).

For response times (Figure S2B), an aligned rank transformed linear mixed model including experiment site as a between-subjects factor and sequence length as a within-subjects factor revealed a significant main effect of sequence length (*F*1,46 = 152.89, *p* < 0.0001). The main effect of experiment site (*F*1,46 = 0.03, *p* = 0.86) and the interaction between experiment site and sequence length (*F*1,46 = 1.14, *p* = 0.29) were not significant.


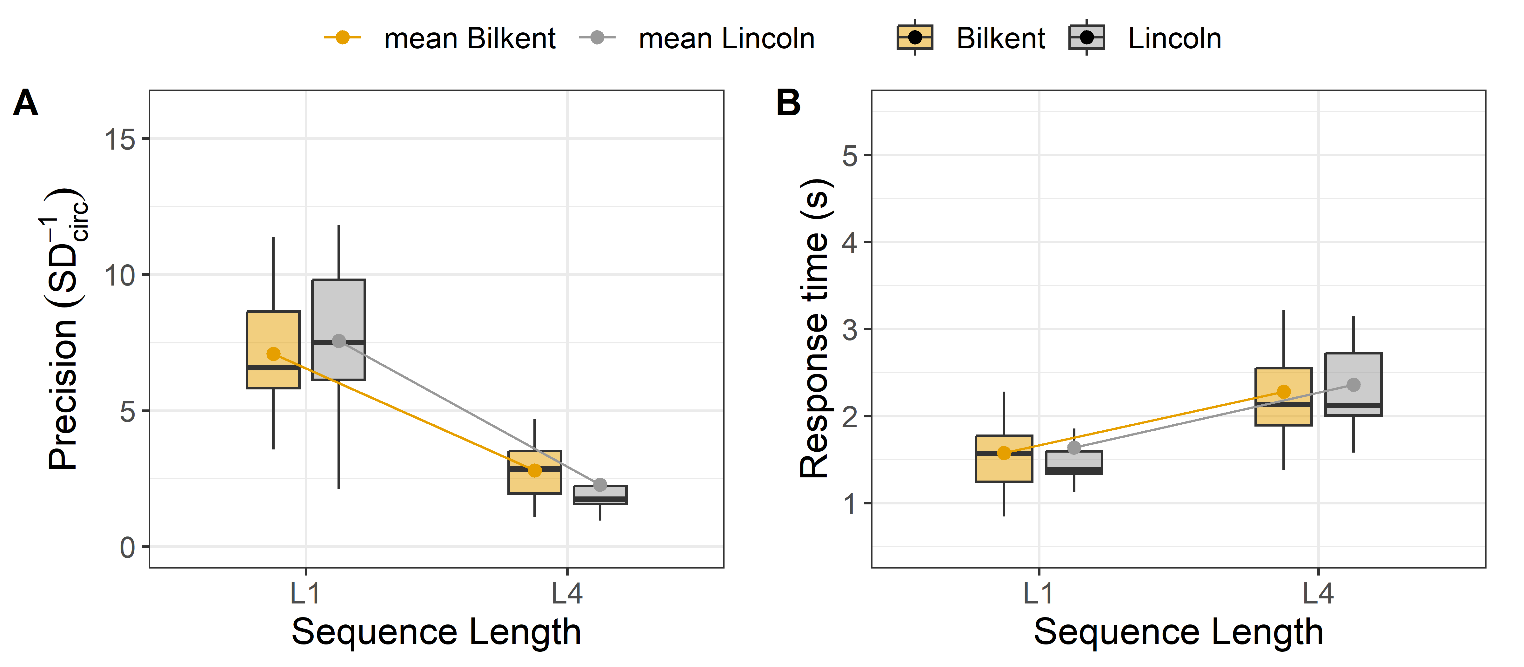


**Figure S2.** (**A**) Box plots of precision scores in the long delay condition for each sequence length in both experiment sites. (**B**) Box plots of response times in the long delay condition for each sequence length in both sites.

**Table S2.** Pairwise comparisons for the significant interaction between experiment site and sequence length for the precision score within the long delay condition.

| Contrast | t ratio | p value  (Holm-corrected) |
| --- | --- | --- |
| Stimulus 1 – Bilkent vs. Lincoln | -0.646 | 0.520 |
| Stimuli 4 – Bilkent vs. Lincoln | 1.422 | 0.319 |
| Bilkent – Stimuli 1 vs. 4 | 12.435 | < .0001 |
| Lincoln – Stimuli 1 vs. 4 | 10.027 | < .0001 |
| Bilkent Stimuli 1 vs. Lincoln Stimuli 4 | 7.825 | < .0001 |
| Bilkent Stimuli 4 vs. Lincoln Stimuli 1 | -7.050 | < .0001 |

*Response time analyses*

*Response times for sequence lengths (short and long retention intervals)*

The response times in the main experiment are shown in Figure S3. For the short retention interval blocks (Figure S3A), the residuals of the response times were not normally distributed (Shapiro-Wilk *W* = 0.96, *p* < 0.0001), skewness was 0.70 (SE: 0.18), and the two groups had equal variances (*F*1,190 = 1.6, *p* = 0.2). Using the boxplot method, we identified two outliers (RTs > 3 s) that were nevertheless included in the analysis. An aligned rank transform ANOVA including group (AVGPs and NAVGPs) as between-subjects factor and sequence length (1 to 4 stimuli) as within-subjects factor revealed a significant main effect of sequence length (*F*3,138 = 76.33, *p* < 0.0001, *ɳp2* = 0.624). The main effect of group (*F*1,46 = 0.20, *p* = 0.65, *ɳp2* = 0.004) and the interaction between group and sequence length (*F*3,138 = 0.51, *p* = 0.68, *ɳp2* = 0.011) did not reach significance. For the main effect of sequence length, Holm-corrected post hoc comparisons revealed that response times for each length were lower (i.e., faster responses) than each of the longer sequence lengths (all *padj* < 0.01). A trend analysis for response times indicated that there was a significant linear and cubic trend (linear: *F*1,46 = 106.86, *p* < 0.0001, *ɳp2* = 0.7; cubic: *F*1,46 = 7.55, *p* = 0.009, *ɳp2* = 0.14).

For the long retention interval blocks (Figure S3B), the residuals of the response times were not normally distributed (Shapiro-Wilk *W* = 0.89, *p* < 0.0001), skewness was 1.57 (SE: 0.25), and the two groups had equal variances (*F*1,94 = 0.18, *p* = 0.67). Using the boxplot method, we identified three outliers (RTs > 3 s) that were nevertheless included in the analysis. An aligned rank transform ANOVA including group (AVGPs and NAVGPs) and sequence length (1 stimulus and 4 stimuli) as factors revealed only a significant main effect of sequence length (*F*1,46 = 190.59, *p* < 0.0001, *ɳp2* = 0.806) but no effect of group and no interaction (group: *F*1,46 = 0.9, *p* = 0.35, *ɳp2* = 0.019; group x sequence length interaction: *F*1,46 = 1.54, *p* = 0.22, *ɳp2* = 0.032), showing that response times significantly increased in the 4-stimuli condition compared to the single stimulus condition for both groups.


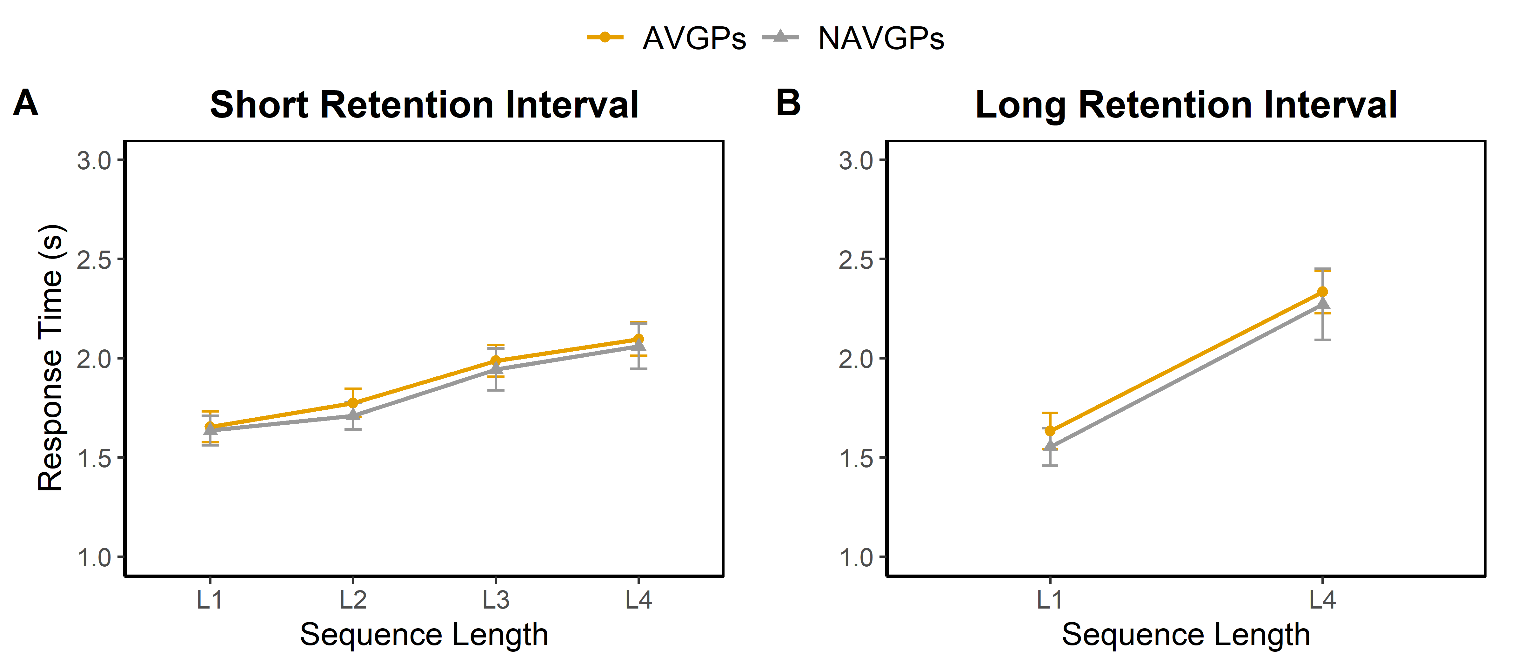


**Figure S3.** Mean response times (in seconds) in the main experiment. **(A)** Response times in short retention interval blocks as a function of sequence length. **(B)** Response times in long retention interval blocks as a function of sequence length. Yellow filled circles combined with yellow lines represent the findings for AVGPs and gray filled triangles combined with gray lines represent the results for NAVGPs. Error bars show ±1 SEM. Response times were obtained by pooling the values for each target serial position within each motion sequence exceeding one stimulus.

*Response times for target positions in motion sequences*

*Short retention interval*

Figure S4 shows the response times (in seconds) in the main experiment for each target serial position within each motion sequence. For sequence length of 1 (Figure S4A), the residuals of the precision scores were not normally distributed (Shapiro-Wilk *W* = 0.94, *p* = 0.016), skewness was 0.68 (SE: 0.34) and using the method of boxplot we did not find any outliers. The assumption of equality of variances between the two groups was met (*F*1,46 < 0.01, *p* = 0.97). The Mann-Whitney U test did not show a significant difference between the two groups (Mann-Whitney U = 288, *p* = 0.99, *r* < 0.01, 95% CI for rank-biserial correlation [-0.32, 0.32]).

For the sequence length of 2 (Figure S4B), the residuals of the response times were normally distributed (Shapiro-Wilk *W* = 0.98, *p* = 0.07), skewness was 0.36 (SE: 0.25), and the method of boxplot did not detect any outliers. The assumption of equality of variances between the two groups was met (*F*1,94 = 0.10, *p* = 0.8). An aligned rank transform ANOVA including group (AVGPs and NAVGPs) as between-subjects factor and target serial position as within-subjects factor revealed a significant effect of the target serial position (*F*1,46 = 8.49, *p* = 0.006, *ɳp2* = 0.16), in which the response time of the target in position 2 was faster than when the target was in position 1 (group: *F*1,46 = 0.33, *p* = 0.57, *ɳp2* = 0.007; interaction between group and target serial position: *F*1,46 = 0.07, *p* = 0.8, *ɳp2* = 0.001).

For the sequence length of 3 (Figure S4C), the residuals of the response times were not normally distributed (Shapiro-Wilk *W* = 0.91, *p* < 0.0001), skewness was 1.35 (SE: 0.2) and using the method of box plot we found six outlier response times (RTs > 3 s) that were nevertheless included in the analysis. The assumption of equality of variances between the two groups was met (*F*1,142 = 3.6, *p* = 0.06). An aligned rank transform ANOVA did report only a significant effect of the target serial position (*F*2,92 = 17.09, *p* < 0.0001, *ɳp2* = 0.271), whereas the main effect of group and the interaction between group and target serial position did not reach the significance level (group: *F*1,46 = 0.52, *p* = 0.48, *ɳp2* = 0.011; interaction between group and target serial position: *F*2,92 = 1.23, *p* = 0.3, *ɳp2* = 0.026). For the main effect of target serial position, Holm-corrected post hoc comparisons pointed out a significant difference between all the target in positions: 1 and 2 (*padj* = 0.006), 1 and 3 (*padj* = 0.006), and 2 and 3 (*padj* < 0.0001). A trend analysis showed that for response times there was a significant linear and quadratic trend (linear: *F*1,46 = 5.34, *p* = 0.026, *ɳp2* = 0.1; quadratic: *F*1,46 = 12.64, *p* = 0.001, *ɳp2* = 0.22).

For the sequence length of 4 (Figure S4D), the residuals of the response times were not normally distributed (Shapiro-Wilk *W* = 0.96, *p* < 0.0001), skewness was 0.76 (SE: 0.18) and using the method of box plot we found four outlier data points that were included in the analysis (outlier response times > 3 s). The assumption of equality of variances between the two groups was not met, though the Levene’s test was only marginally significant (*F*1,190 = 3.87, *p* = 0.051). An aligned rank transform ANOVA revealed only a significant effect of the target serial position (*F*3,138 = 34.14, *p* < 0.0001, *ɳp2* = 0.426), whereas group and the interaction between group and target serial position did not reach the significance level (group: *F*1,46 = 0.22, *p* = 0.64, *ɳp2* = 0.005; interaction between group and target serial position: *F*3,138 = 1.04, *p* = 0.38, *ɳp2* = 0.022). For the main effect of target serial position, Holm-corrected post hoc comparisons (Holm method for 6 tests) pointed out a significant difference between positions 1 and 2 (*padj* < 0.0001), positions 1 and 3 (*padj* < 0.0001), positions 1 and 4 (*padj* = 0.004), between positions 2 and 4 (*padj* < 0.0001), and positions 3 and 4 (*padj* < 0.0001). All the other comparisons did not reach the significance level (*padj* > 0.05). A trend analysis showed that for response times there was a significant linear and quadratic trend (linear: *F*1,46 = 6.93, *p* = 0.011, *ɳp2* = 0.13; quadratic: *F*1,46 = 82.2, *p* < 0.0001, *ɳp2* = 0.64), but not a cubic trend (*F*1,46 = 0.31, *p* = 0.58, *ɳp2* = 0.007).





**Figure S4.** Mean response times (in seconds) for each target serial position within each sequence length in the short retention interval blocks. **A** - **D**: sequence lengths of 1 to 4 stimuli. Error bars show ±1 SEM.

*Long retention interval*

Figure S5 shows the response times in the main experiment for each target serial position for the long retention interval blocks within motion sequences of 1 and 4 stimuli (different panels). For sequence length of 1 (Figure S5A), the residuals of the precision scores were not normally distributed (Shapiro-Wilk *W* = 0.93, *p* = 0.005), skewness was 0.98 (SE: 0.34) and using the method of boxplot we found three outliers (outlier response times: 2.88, 2.80, and 2.59) that were nevertheless included in the analysis. The assumption of equality of variances between the two groups was met (*F*1,46 = 0.02, *p* = 0.88). The Mann-Whitney U test did not reveal a significant difference between the two groups (Mann-Whitney U = 320, *p* = 0.52, *r* = 0.11, 95% CI for rank-biserial correlation [-0.22, 0.41]).

For the sequence length of 4 (Figure S5B), the residuals of the response times were not normally distributed (Shapiro-Wilk *W* = 0.84, *p* < 0.0001), skewness was 2.02 (SE: 0.18) and using the method of box plot we found ten outlier data points that were nevertheless included in the analysis (outlier response times > 3 s and < 7 s). The assumption of equality of variances between the two groups was met (*F*1,190 = 3.7, *p* = 0.056), though the Levene’s test was marginally significant. An aligned rank transform ANOVA revealed a significant effect only for the target serial position (*F*3,138 = 28.42, *p* < 0.0001, *ɳp2* = 0.382). The effect of the group and interaction between group and target serial position did not reach the significance level (group: (*F*1,46 = 1.34, *p* = 0.25, *ɳp2* = 0.028; interaction group x target serial position: *F*3,138 = 0.28, *p* = 0.84, *ɳp2* = 0.006). For the main effect of target serial position, Holm-corrected post hoc comparisons (Holm method for 6 tests) revealed a significant difference between positions 1 and 2 (*padj* < 0.0001), positions 1 and 3 (*padj* < 0.0001), positions 2 and 4 (*padj* < 0.0001) and positions 3 and 4 (*padj* < 0.0001). All the other comparisons did not reach the significance level (*padj* > 0.05). A trend analysis showed that for response times there was a significant linear and quadratic trend (linear: *F*1,46 = 6.93, *p* = 0.011, *ɳp2* = 0.13; quadratic: *F*1,46 = 82.2, *p* < 0.0001, *ɳp2* = 0.64), but not a cubic trend (*F*1,46 = 0.31, *p* = 0.58, *ɳp2* = 0.007).





**Figure S5.** Mean response times (in seconds) for each target serial position within each sequence length in the long retention interval blocks. **A** and **B**: sequence lengths of 1 and 4 stimuli. Error bars show ±1 SEM.

*Predictions of the Resource-Rational Model (short and long retention intervals)*

Figure S6 shows the predictions of the RRM for short retention interval blocks based on the mean parameter values obtained for the two groups. For AVGPs, the values were *β* = 0.79 (SEM = 0.17) and λ = 0.0009 (SEM = 0.0001), while for NAVGPs, the values were *β* = 0.78 (SEM = 0.14) and λ = 0.0010 (SEM = 0.0001). In the left panels of Figure S6, the expected behavioral and neural costs across all memory items are depicted as functions of the resource per item in panels A and B for AVGPs and NAVGPs, respectively. Notably, the expected neural cost (*λC*neural) depends on the set size (N) and increases with the amount of resources per item. Conversely, the expected behavioral cost (*C*behavioral) across all items decreases with the amount of resources per item, regardless of set size. The cumulative cost functions (i.e., the sum of behavioral and neural cost, *C*behavioral + *λC*neural) are depicted in the middle panels of Figures S6A and B for AVGPs and NAVGPs, respectively. These functions reveal the unique minimum value of the for each set size, representing the optimal value of resource allocation () on the x-axis that minimizes the total cost on the y-axis. The right panels present the optimal resource allocation as a function of set size in Figures S6A and S6B for AVGPs and NAVGPs, respectively. Given that our study design defined an equal probability of probing each item, the resources per item exhibit a monotonically decreasing relationship with set size. The cost functions and optimal resource allocation exhibit a comparable pattern between the two groups, as expected, given the lack of significant differences in *β* and *λ* estimates in the short retention interval blocks.


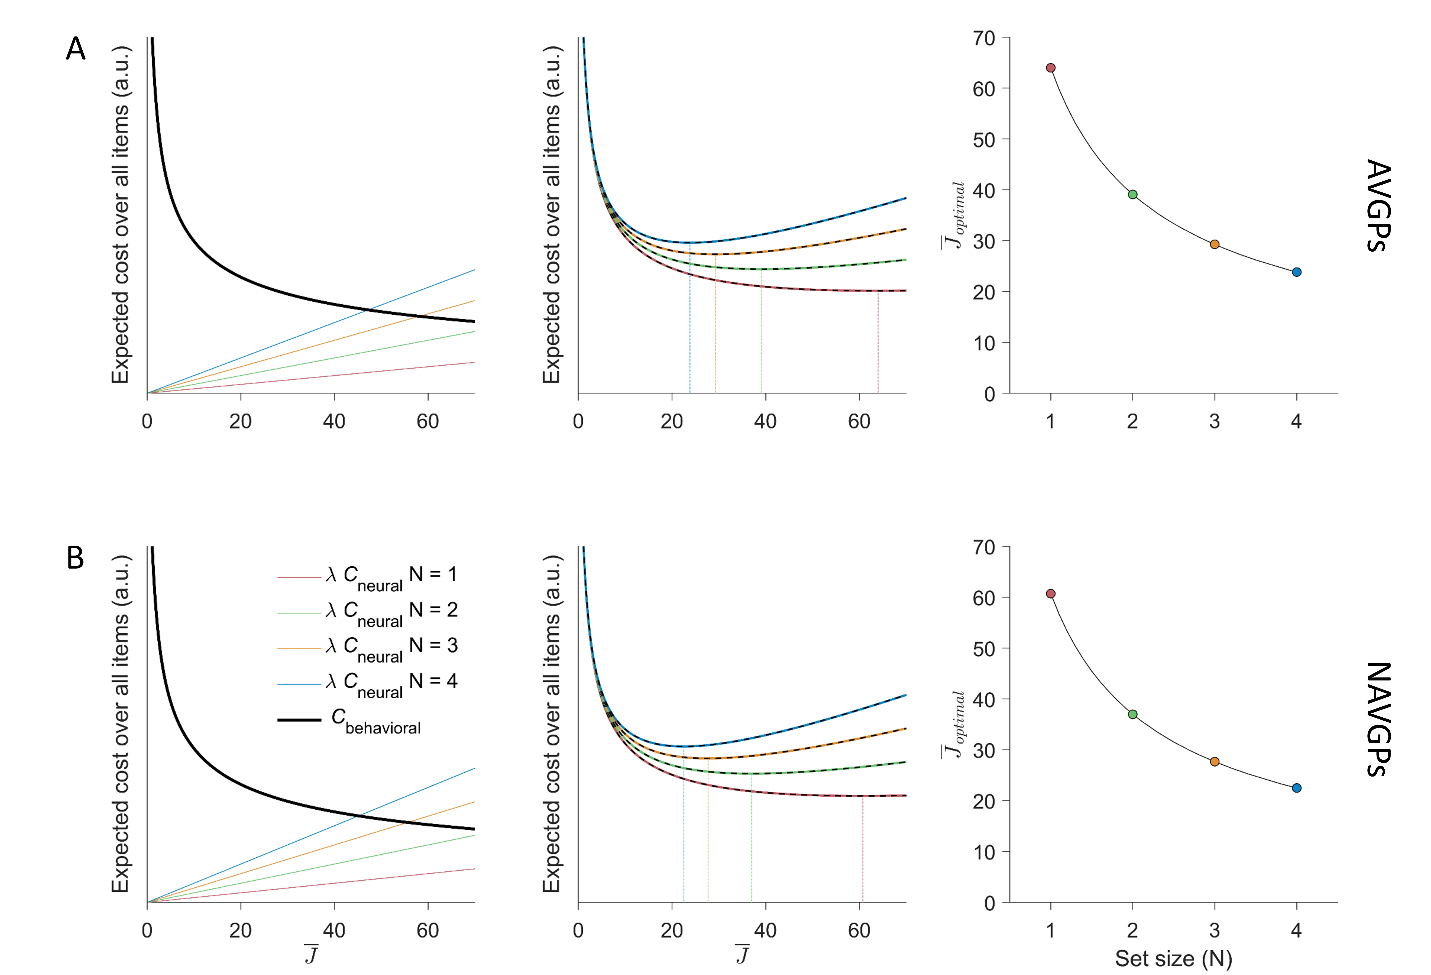


**Figure S6.** Predictions of the Resource-Rational Model within the short retention interval blocks for AVGPs **(A)** and NAVGPs **(B)**. *Left panels:* Expected behavioral and neural cost across all items as a function of resources per item (). Each item was probed with a probability of 1/N. The black curve represents the behavioral cost (*C*behavioral) and the colored lines correspond to the neural cost (*C*neural) for each set size (N). *Middle panels:* Cumulative cost functions (*C*behavioral + *λC*neural). Colored vertical dashed lines mark the unique minimum value of the for each set size, which corresponds to the optimal resource per item) minimizing the total expected cost. *Right panels:* Optimal amount of resource per item as a function of set size. The cost values and the amount of resources are in arbitrary units (a.u.). Identical scales are used in the left and middle panels.

Figure S7 shows the predictions of the RRM for the long retention interval blocks, based on the mean parameter estimates for the two groups: *β* = 0.33 (SEM = 0.08) and *λ* = 0.0007 (SEM = 0.0001) for AVGPs, and *β* = 0.45 (SEM = 0.08) and *λ* = 0.0012 (SEM = 0.0001) for NAVGPs. Consistent with the short retention interval blocks, the resources allocated per item decrease monotonically with set size (Figure S7A and S7B, right panels). However, unlike the short retention interval, the cost functions and the resulting optimal resource allocation patterns differ between the two groups during the long retention interval blocks (Figure S7A and S7B, middle panels). Although the *β* values were comparable between the groups, a statistically significant difference emerged in the *λ* estimates, with NAVGPs having significantly higher values than AVGPs. This difference resulted in a reduction in the optimal amount of resources allocated per item in the NAVGPs group. Specifically, the increased neural cost of resource allocation relative to the associated behavioral gain in NAVGPs makes it suboptimal to allocate additional resources to encoding, revealing this discernable pattern.


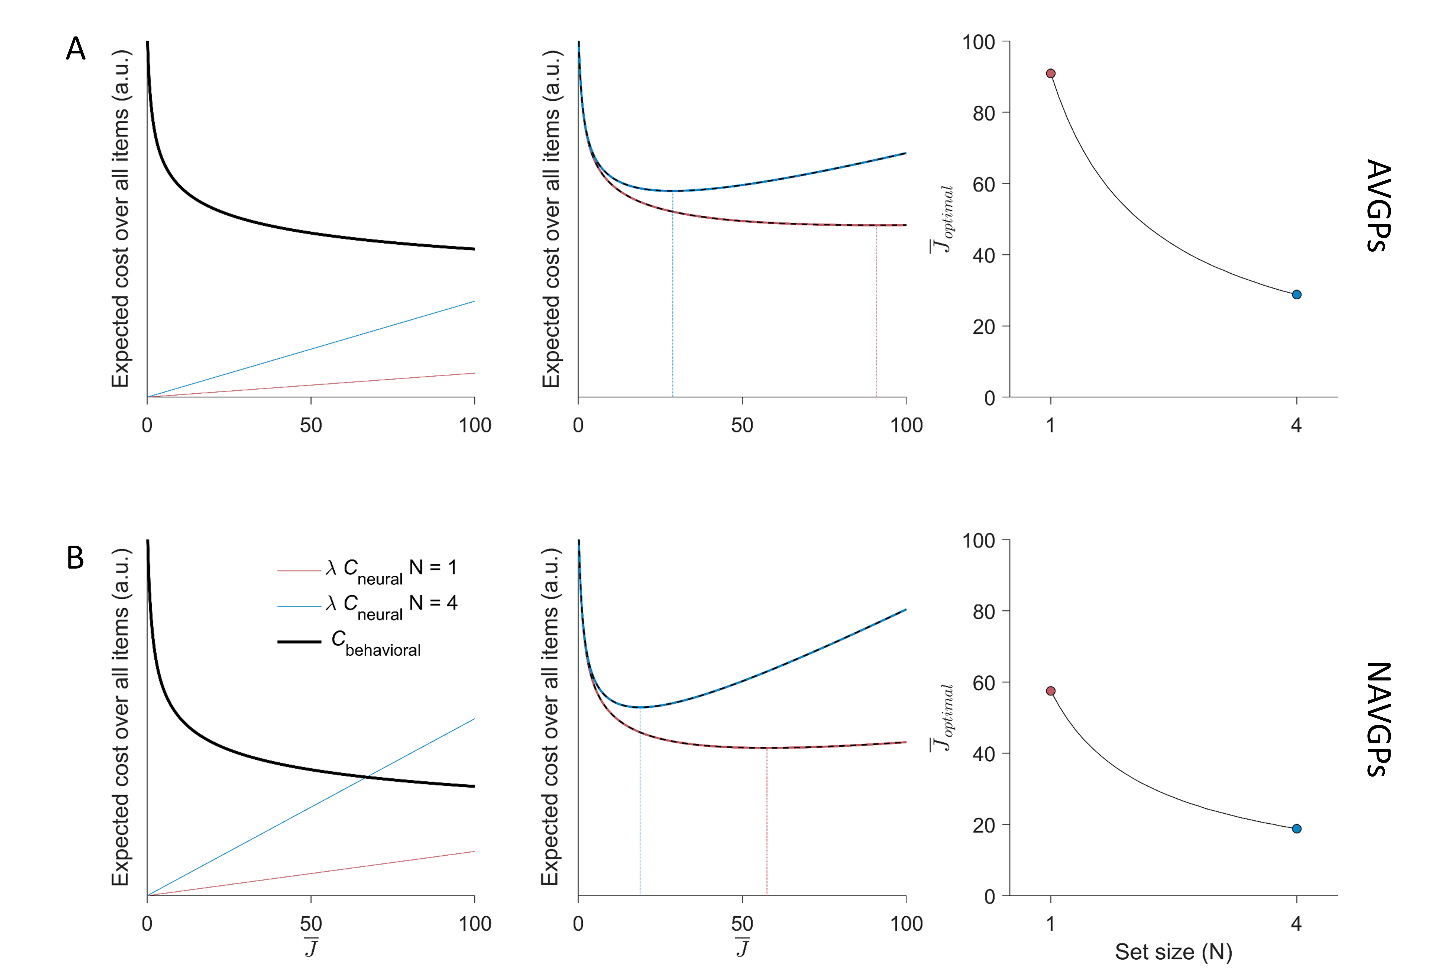


**Figure S7.** Predictions of the Resource-Rational Model within the long retention interval blocks for AVGPs **(A)** and NAVGPs **(B)**. *Left panels:* Expected behavioral and neural cost across all items as a function of resources per item (). Each item was probed with a probability of 1/N. The black curve represents the behavioral cost (*C*behavioral), and the colored lines correspond to the neural cost (*C*neural) for each set size (N). *Middle panels:* Cumulative cost functions (*C*behavioral + *λC*neural). Colored vertical dashed lines mark the unique minimum value of the for each set size, which corresponds to the optimal resource per item minimizing the total expected cost. *Right panels:* Optimal amount of resource per item as a function of set size. The cost values and the amount of resources are in arbitrary units (a.u.). Identical scales are used in the left and middle panels.
